# Supplementary material for: Effect of perimeter interface length between 2D WO3 monolayer domain and γ-Al2O3 on selective hydrogenolysis of glycerol to 1,3-propanediol
Source: Royal Society of Chemistry journal article supplement (doi:10.1039/c9cy01385g), 2019-01-01
Supplement: c9cy01385g1.pdf [file c9cy01385g1.pdf]

## Supporting Information

### Effect of Perimeter Interface Length between 2D WO<sub>3</sub> Monolayer Domain and $\gamma$ -Al<sub>2</sub>O<sub>3</sub> on Selective Hydrogenolysis of Glycerol to 1,3-Propanediol

Takeshi Aihara<sup>a</sup>, Hiroki Miura<sup>a,b,d</sup>, and Tetsuya Shishido<sup>a,b,c,d\*</sup>

<sup>a</sup> Department of Applied Chemistry for Environment, Graduate School of Urban Environmental Sciences, Tokyo Metropolitan University, 1-1 Minami-Osawa, Hachioji, Tokyo 192-0397, Japan

<sup>b</sup> Research Center for Hydrogen Energy-based Society, Tokyo Metropolitan University, 1-1 Minami-Osawa, Hachioji, Tokyo 192-0397, Japan

<sup>c</sup> Research Center for Gold Chemistry, Tokyo Metropolitan University, 1-1 Minami-Osawa, Hachioji, Tokyo 192-0397, Japan

<sup>d</sup> Elements Strategy Initiative for Catalysts & Batteries, Kyoto University, Katsura, Nishikyo-ku, Kyoto 615-8520, Japan

\* Corresponding author: Tel: +81-42-677-2850 Fax: +81-42-677-2850 (T. Shishido)

E-mail address: shishido-tetsuya@tmu.ac.jp (T. Shishido)

## **Analytical data**

### **Contents:**

1. Effect of  $\text{WO}_3$  loading on hydrogenolysis over  $\text{Pt}/\text{WO}_3/\text{Al}_2\text{O}_3$  catalysts
2. Investigation of the surface acidity of  $\text{Pt}/\text{WO}_3/\text{Al}_2\text{O}_3$  catalysts by  $\text{NH}_3$ -TPD and Pyridine adsorbed IR.
3. Effect of Pt dispersion on hydrogenolysis over  $\text{Pt}/\text{WO}_3/\text{Al}_2\text{O}_3$  catalysts.
4. TEM image of  $\text{WO}_3/\text{Al}_2\text{O}_3$  catalyst.
5. XP spectra of  $\text{Pt}/\text{WO}_3/\text{Al}_2\text{O}_3$  and  $\text{WO}_3/\text{Al}_2\text{O}_3$  catalysts with various  $\text{WO}_3$  loadings in the W 4f region
6. Deconvolution of the W  $L_{1}$ -edge XANES spectra in  $\text{Pt}/\text{WO}_3/\text{Al}_2\text{O}_3$  catalysts and reference samples
7. XP spectra of  $\text{Pt}/\text{WO}_3/\text{Al}_2\text{O}_3$  before and after reduction in the W 4f region

## 1. Effect of WO<sub>3</sub> loading on hydrogenolysis over Pt/WO<sub>3</sub>/Al<sub>2</sub>O<sub>3</sub> catalysts

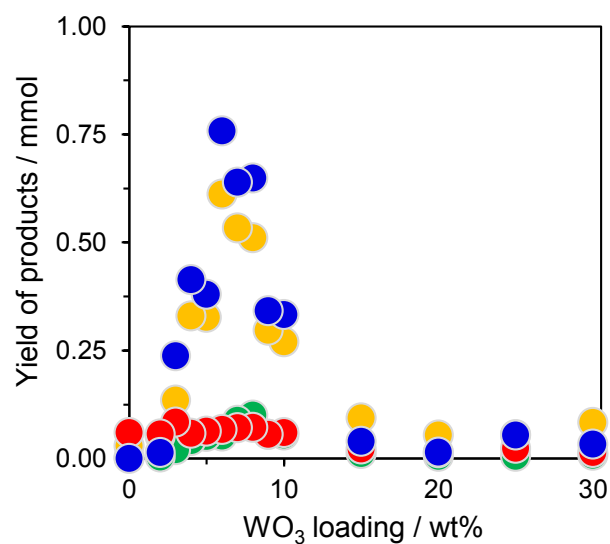

| WO <sub>3</sub> loading<br>/ wt% | Yield / mmol |                 |                 |        |        |
|----------------------------------|--------------|-----------------|-----------------|--------|--------|
|                                  | Glycerol     | 1,3-Propanediol | 1,2-Propanediol | 1-PrOH | 2-PrOH |
| 30                               | 2.53         | 0.03            | 0.01            | 0.08   | 0.01   |
| 25                               | 2.67         | 0.05            | 0.02            | 0.05   | 0.00   |
| 20                               | 2.81         | 0.02            | 0.01            | 0.05   | 0.01   |
| 15                               | 2.72         | 0.04            | 0.02            | 0.09   | 0.01   |
| 10                               | 2.19         | 0.33            | 0.06            | 0.27   | 0.05   |
| 9                                | 1.95         | 0.34            | 0.06            | 0.30   | 0.06   |
| 8                                | 1.45         | 0.65            | 0.07            | 0.51   | 0.10   |
| 7                                | 1.31         | 0.64            | 0.07            | 0.53   | 0.09   |
| 6                                | 1.38         | 0.76            | 0.07            | 0.61   | 0.05   |
| 5                                | 1.97         | 0.38            | 0.06            | 0.33   | 0.05   |
| 4                                | 2.07         | 0.41            | 0.06            | 0.33   | 0.04   |
| 3                                | 2.23         | 0.24            | 0.08            | 0.14   | 0.02   |
| 2                                | 2.83         | 0.01            | 0.06            | 0.05   | 0.00   |
| 0                                | 2.88         | 0.00            | 0.06            | 0.03   | 0.00   |

**Figure S1.** Effect of WO<sub>3</sub> loading on hydrogenolysis over Pt/WO<sub>3</sub>/Al<sub>2</sub>O<sub>3</sub> catalysts. Conditions: Glycerol (3 mmol), Catalyst (100 mg), H<sub>2</sub>O (9 mL),  $P_{\text{H}_2}$  = 5 MPa,  $T$  = 453 K,  $t$  = 15 h. ●: 1,3-propanediol, ●: 1,2-propanediol, ●: 1-propanol, ●: 2-propanol.

## 2. Investigation of the surface acidity of Pt/WO<sub>3</sub>/Al<sub>2</sub>O<sub>3</sub> catalysts by NH<sub>3</sub>-TPD and Pyridine adsorbed IR.

NH<sub>3</sub>-TPD was carried out to estimate the acidity on the catalysts. The TPD was performed on a MicrotracBEL BELCAT-II in the following manners: 100 mg of catalyst was pretreated with He (50 mL min<sup>-1</sup>) gas at 773 K for 1 h. The sample was cooled down to 373 K in He gas. Gaseous NH<sub>3</sub>/He (5/45 mL min<sup>-1</sup>) was adsorbed for 1 h and then removed in He gas for 1 h. Consecutively, TPD was started at 373 K, and the temperature was raised to 873 K at a ramping rate of 10 K min<sup>-1</sup> under in the flowing He. The desorbed products were determined by using a BELMass and recorded on an online personal computer. All IR spectra were recorded using a FT-IR spectrometer (FT/IR-4200 typeA, JASCO, Hachioji, Tokyo, Japan) equipped with a TCD detector at 298 K. Each sample (30 mg) was pressed into a self-supporting wafer with a diameter of 20 mm. Catalysts were pretreated under 20 kPa of O<sub>2</sub> for 1 h at 773 K and then cooled with evacuation. To determine the amount of Brønsted and Lewis acid sites on catalysts, The catalyst was exposed to 0.5 kPa of flowing pyridine vapor at 298 K for 15 min and then evacuated at 423 K for 15 min.

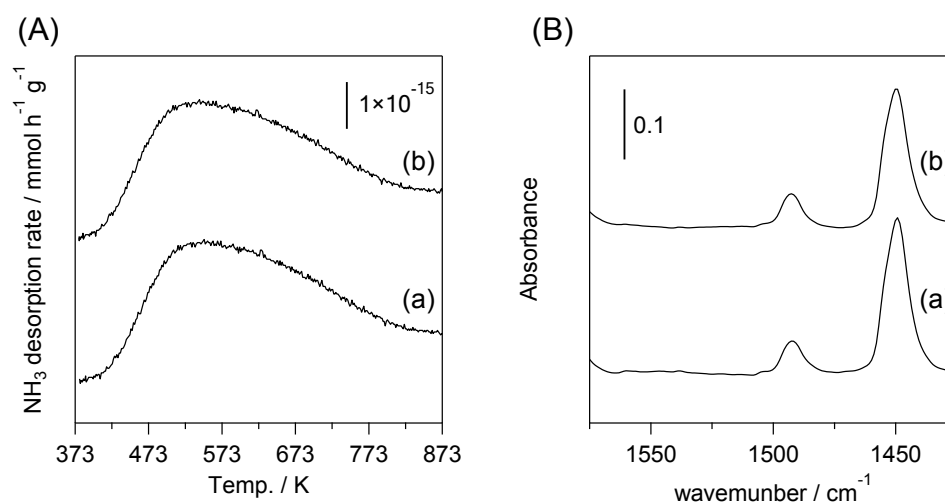

| Catalyst        | Acidity / $\mu\text{mol g}^{-1}$ |                           |                        |
|-----------------|----------------------------------|---------------------------|------------------------|
|                 | NH <sub>3</sub> -TPD             | Pyridine IR<br>(Brønsted) | Pyridine IR<br>(Lewis) |
| After reaction  | 158                              | 0                         | 143                    |
| Before reaction | 137                              | 0                         | 156                    |

**Figure S2.** (A) NH<sub>3</sub>-TPD profiles of Pt/WO<sub>3</sub>/Al<sub>2</sub>O<sub>3</sub> with 20 wt% WO<sub>3</sub> loading catalysts. (B) IR spectrum of pyridine on Pt/WO<sub>3</sub>/Al<sub>2</sub>O<sub>3</sub> catalysts with 20 wt% WO<sub>3</sub> loading. (a) catalyst before reaction and (b) catalyst after reaction.

### 3. Effect of Pt dispersion on hydrogenolysis over Pt/WO<sub>3</sub>/Al<sub>2</sub>O<sub>3</sub> catalysts.

The Pt dispersion of the catalyst was measured by the CO pulse method at room temperature using an Okura BP-2 instrument (Okura Riken, Japan) with a thermal conductivity detector (TCD). Prior to CO adsorption, the catalyst was pre-treated with H<sub>2</sub> at 453 K for 1 h. The stoichiometric ratio of Pt/CO was assumed to be 1:1 for the calculation of the accessible surface Pt atoms on the catalysts.

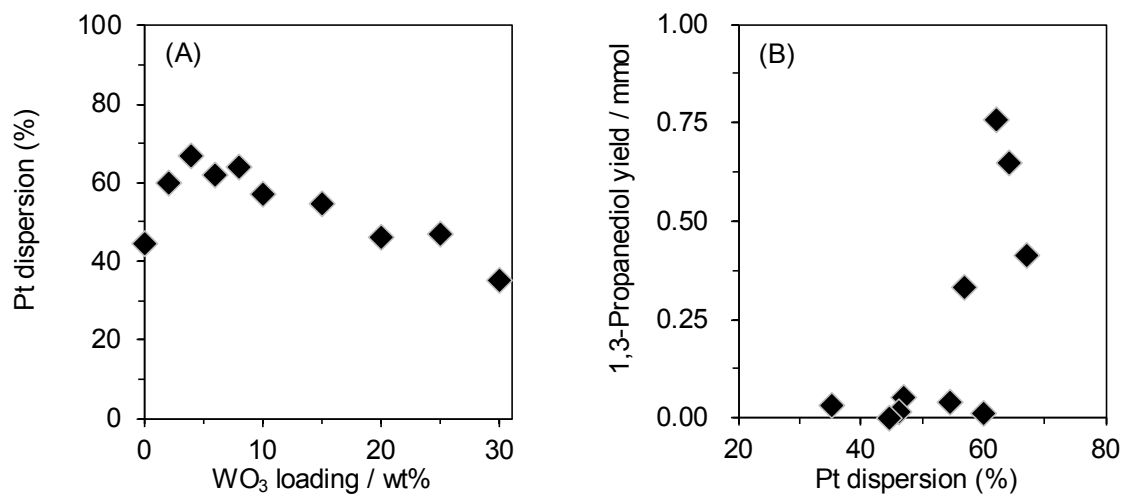

**Figure S3.** (A) Pt dispersion of Pt/WO<sub>3</sub>/Al<sub>2</sub>O<sub>3</sub> catalysts with various WO<sub>3</sub> loadings. (B) Effect of Pt dispersion on hydrogenolysis over Pt/WO<sub>3</sub>/Al<sub>2</sub>O<sub>3</sub> catalysts. Conditions: Glycerol (3 mmol), Catalyst (100 mg), H<sub>2</sub>O (9 mL),  $P_{\text{H}_2}$  = 5 MPa,  $T$  = 453 K,  $t$  = 15 h.

#### 4. TEM image of $\text{WO}_3/\text{Al}_2\text{O}_3$ catalyst.

TEM images were recorded using a JEOL JEM-3200FS transmission electron microscope. The samples were prepared by depositing drops of ethanol suspensions containing small amounts of the powders onto carbon-coated copper grids (JEOL Ltd.) followed by evaporation of the ethanol in air.

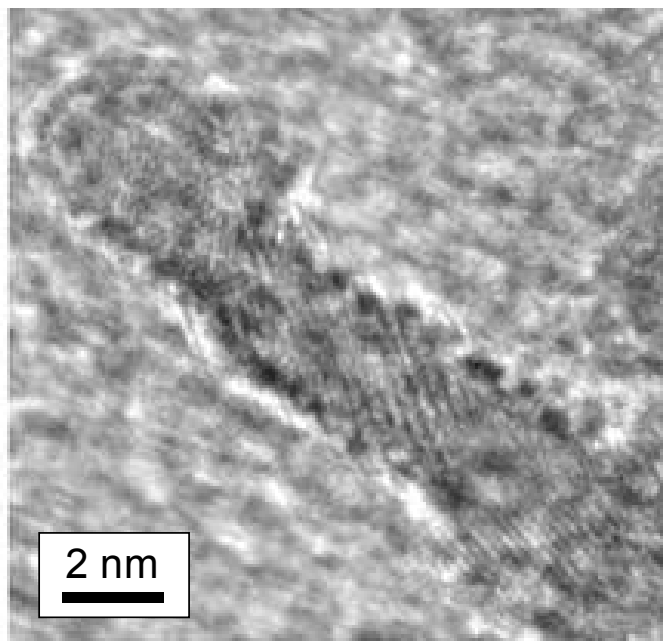

Figure S4. TEM image of  $\text{WO}_3/\text{Al}_2\text{O}_3$  catalyst with 7 wt%  $\text{WO}_3$  loading.

**5. XP spectra of Pt/WO<sub>3</sub>/Al<sub>2</sub>O<sub>3</sub> and WO<sub>3</sub>/Al<sub>2</sub>O<sub>3</sub> catalysts with various WO<sub>3</sub> loadings in the W 4f region**

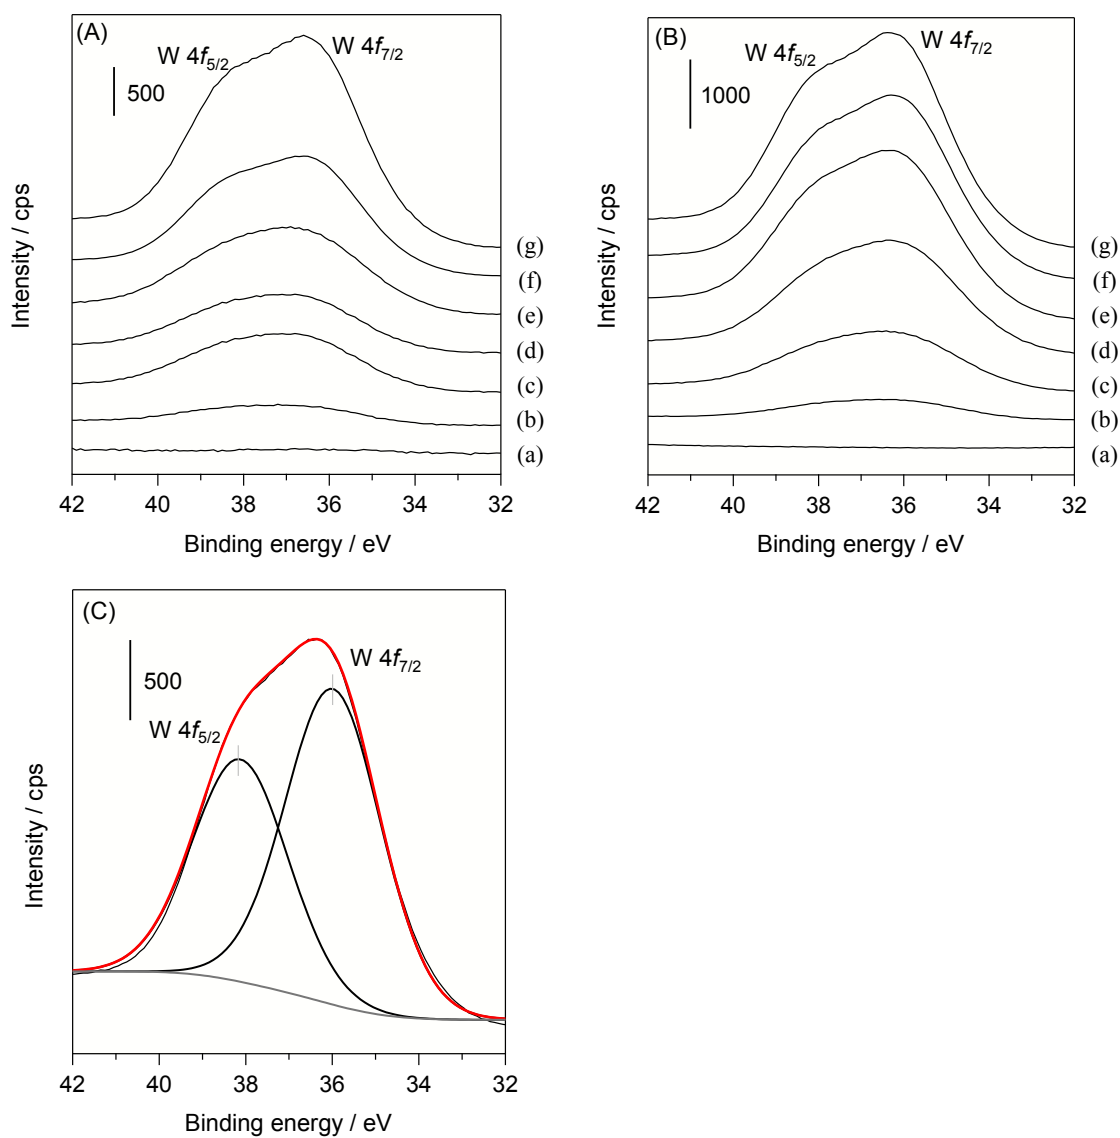

**Figure S5.** XP spectra of Pt/WO<sub>3</sub>/Al<sub>2</sub>O<sub>3</sub> (A) and WO<sub>3</sub>/Al<sub>2</sub>O<sub>3</sub> catalysts (B) with various WO<sub>3</sub> loadings in the W 4f region. (a) 0, (b) 2, (c) 6, (d) 10, (e) 15, (f) 20 and (g) 30 wt%. (C) Fitting result of Pt/WO<sub>3</sub>/Al<sub>2</sub>O<sub>3</sub> catalyst with 20 wt% WO<sub>3</sub> loading. —: spectrum, —: fitting function, — — —: peak 1, ····: peak 2, ---: background.

## 6. Deconvolution of the W L<sub>1</sub>-edge XANES spectra in Pt/WO<sub>3</sub>/Al<sub>2</sub>O<sub>3</sub> catalysts and reference samples

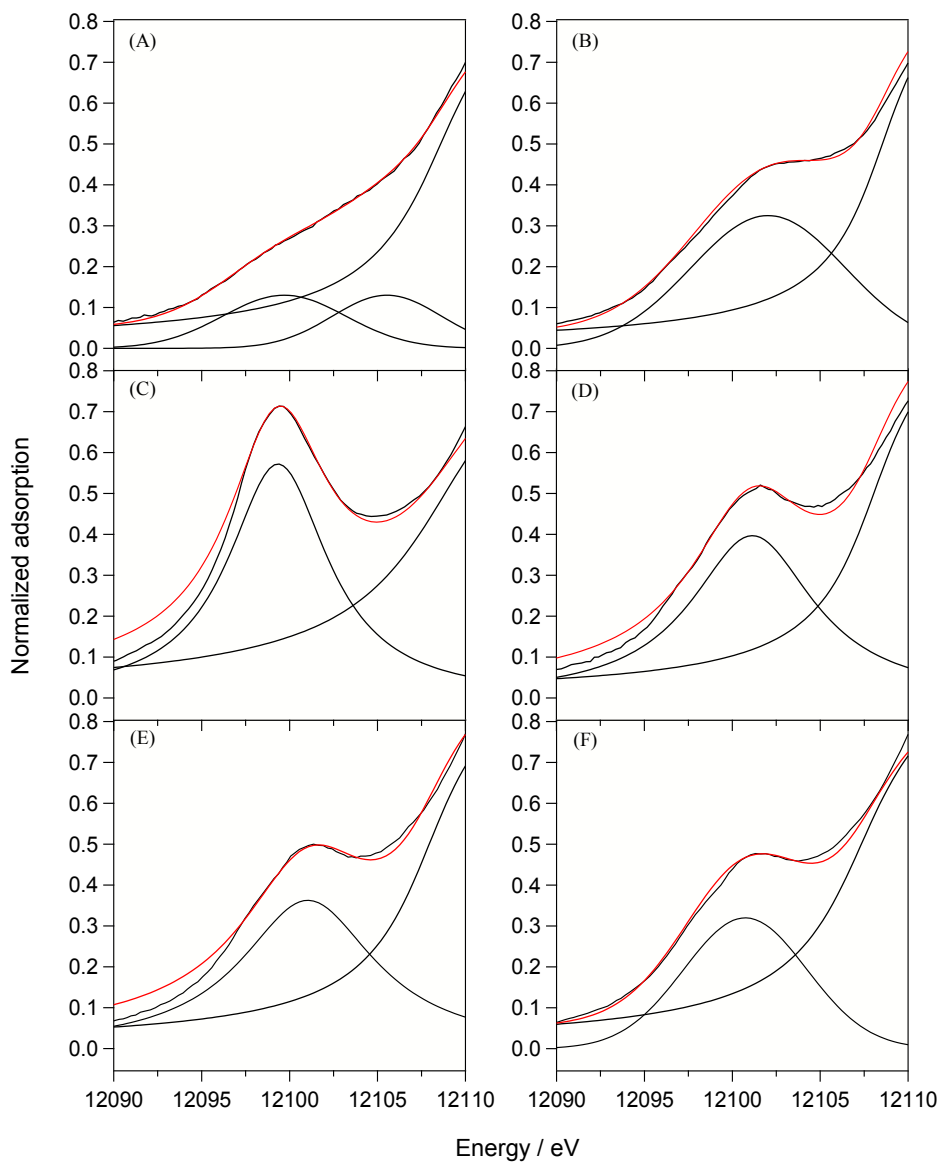

**Figure S6.** Deconvolution of the W L<sub>1</sub>-edge XANES spectra in Pt/WO<sub>3</sub>/Al<sub>2</sub>O<sub>3</sub> catalysts and reference. (A) Ba<sub>2</sub>NiWO<sub>6</sub>, (B) *m*-WO<sub>3</sub>, (C) Na<sub>2</sub>WO<sub>4</sub>, Pt/WO<sub>3</sub>/Al<sub>2</sub>O<sub>3</sub> with (D) 2, (E) 6 and (F) 20 wt% WO<sub>3</sub> loading. —: spectrum, —: fitting function, - - -: peak 1, — — —: peak 2, - - -: background.



## 7. XP spectra of Pt/WO<sub>3</sub>/Al<sub>2</sub>O<sub>3</sub> before and after reduction in the W 4f region

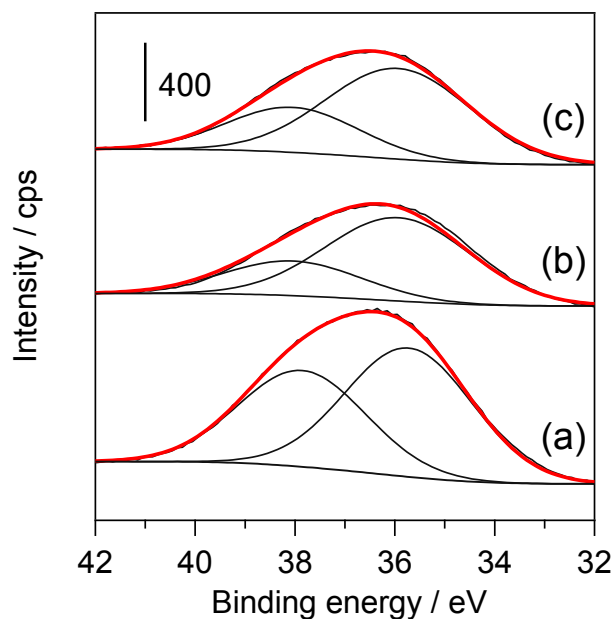

**Figure S7.** XP spectra of Pt/WO<sub>3</sub>/Al<sub>2</sub>O<sub>3</sub> catalysts with 20 wt% WO<sub>3</sub> loading. (a): Fresh, (b): Reduced at 453 K for 1 h under 5 MPaH<sub>2</sub> in H<sub>2</sub>O, (c): Reduced at 573 K for 1 h under 0.1 MPaH<sub>2</sub>. —: spectrum, - - -: fitting function, — — —: peak 1, ·····: peak 2, - - - -: background.
